# Supplementary material for: MicroRNA-124 inhibits macrophage cell apoptosis via targeting p38/MAPK signaling pathway in atherosclerosis development
Source: publisher site journal article supplement (doi:10.18632/aging.103387), 2020-06-30
Supplement: Supplementary file [file aging-v12i13-103387-supplementary-material-SD1.pdf]

## SUPPLEMENTARY FIGURES

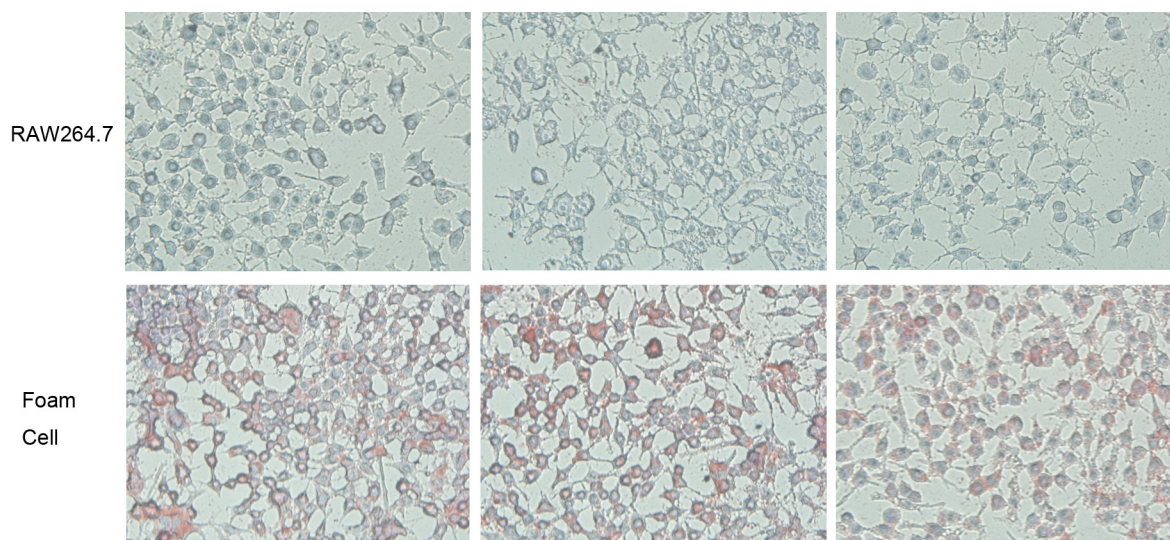

Supplementary Figure 1. Oil red O staining of Raw267 cell and foam cell.

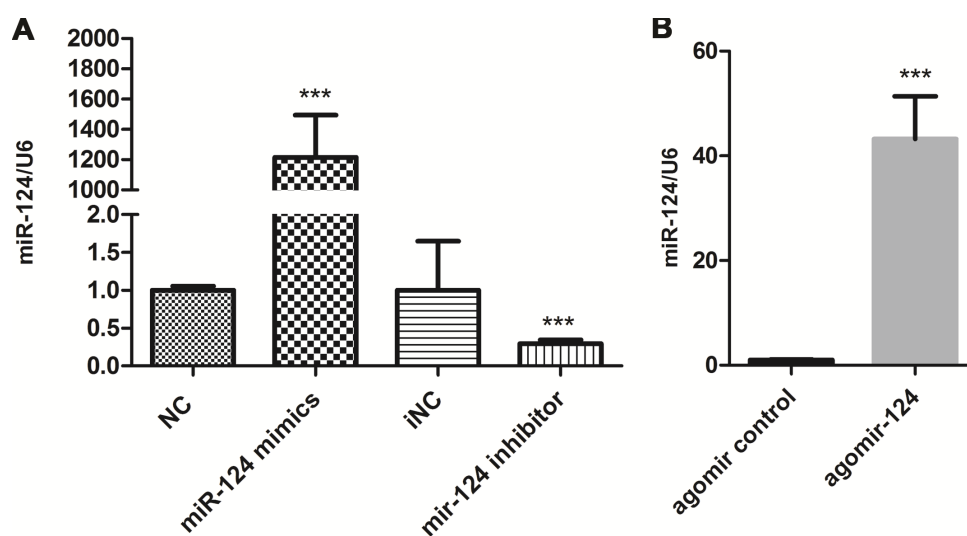

Supplementary Figure 2. Transfection rate of agomir-124 (A), miR-124 mimics, and miR-124 inhibitor (B) detected by qRT-PCR.\*\*\*,  $P < 0.001$  compared with control group.
